# Supplementary material for: External Validation of a Nomogram to Predict Survival and Benefit of Concurrent Chemoradiation for Stage II Nasopharyngeal Carcinoma
Source: MDPI journal article supplement (doi:10.3390/cancers13174286), 2021-08-25
Supplement: s1 [file s1]

## Supplementary Materials

**Table S1.** Patient selection from NPC 1301 study.

|                                             |           |
|---------------------------------------------|-----------|
| Stage II in NPC 1301 study, total, <i>n</i> | 589       |
| Exclusion Criteria                          |           |
|                                             | N (%)     |
| Age >70                                     | 44 (7.5%) |
| Incomplete information                      | 4 (0.7%)  |
| Adjuvant chemotherapy                       | 16 (2.7%) |
| Neoadjuvant chemotherapy                    | 25 (4.2%) |
| Non-WHO type II or III                      | 18 (3.1%) |
| No staging MRI                              | 6 (1%)    |
| Non-definitive treatment received           | 1 (0.17%) |

Some patients excluded fulfilled more than one exclusion criterion

Abbreviations: MRI, magnetic resonance imaging; NPC, nasopharyngeal carcinoma; WHO, World Health Organization
